# Supplementary material
Source: Springer Nature journal article supplement (https://www.springermedizin.de/resource/supplementary/13075_2009_2741_MOESM3_ESM.pdf/9692778)

B

## AUSCAN Function

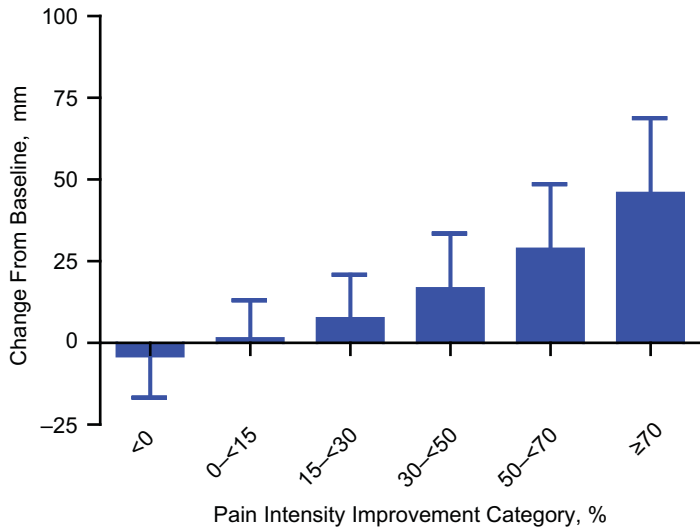

Supplement: MOESM3 [file 9692778]
